# Supplementary material for: Computational design of high triplet energy host materials for phosphorescent blue emitters
Source: Royal Society of Chemistry journal article supplement (doi:10.1039/c3tc30473f), 2013-01-01
Supplement: c3tc30473f.pdf [file c3tc30473f.pdf]

## Computational Design of High Triplet Energy Host Materials for Phosphorescent Blue Emitters

*E. Varathan, Dolly Vijay, P. Shyam Vinod Kumar and V. Subramanian\**  
*CSIR-Network of Institutes for Solar Energy, Chemical lab,*  
*CSIR-Central Leather Research Institute, Adyar, Chennai-600 020.*

### Supporting Information (5 pages including this page)

**Figure S1:** Triplet spin density distribution of asymmetrically substituted tph-bzi based host molecules at B3LYP/6-31G\* level of theory.

**Figure S2:** Triplet spin density distribution of asymmetrically substituted tph-pho based host molecules at B3LYP/6-31G\* level of theory.

**Figure S3:** Triplet spin density distribution of symmetrically substituted bzi based host molecules at B3LYP/6-31G\* level of theory.

**Figure S4:** Triplet spin density distribution of symmetrically substituted cbz based host molecules at B3LYP/6-31G\* level of theory.

**Figure S5:** Triplet spin density distribution of symmetrically substituted pho based host molecules at B3LYP/6-31G\* level of theory.

**Figure S6:** Triplet spin density distribution of symmetrically substituted tph based host molecules at B3LYP/6-31G\* level of theory.

**Figure S7:**  $\Delta E_{ST}$  for all the symmetrically substituted designed host molecules.  $\Delta E_{ST}$  of mcp and core unit is indicated by pink dashed line and orange dot line respectively.

**Figure S8.** Total energies (in Hartree) of neutral, cation and anion hosts at their respective geometries.

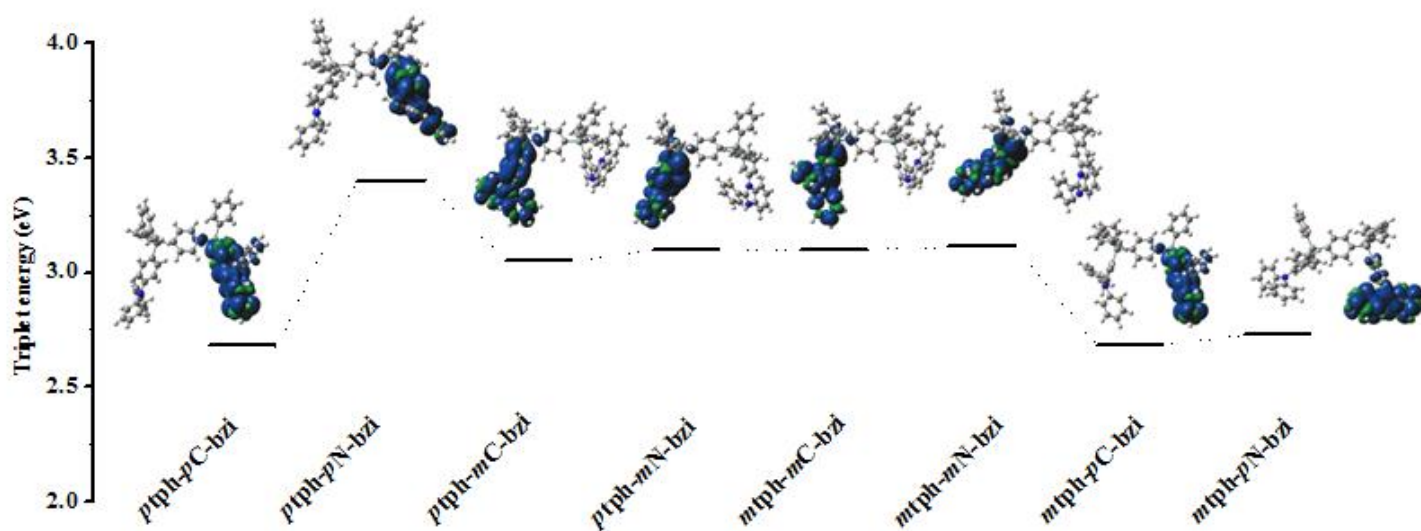

**SI 1.** Triplet spin density distribution of asymmetrically substituted tph-bzi based host molecules at B3LYP/6-31G\* level of theory.

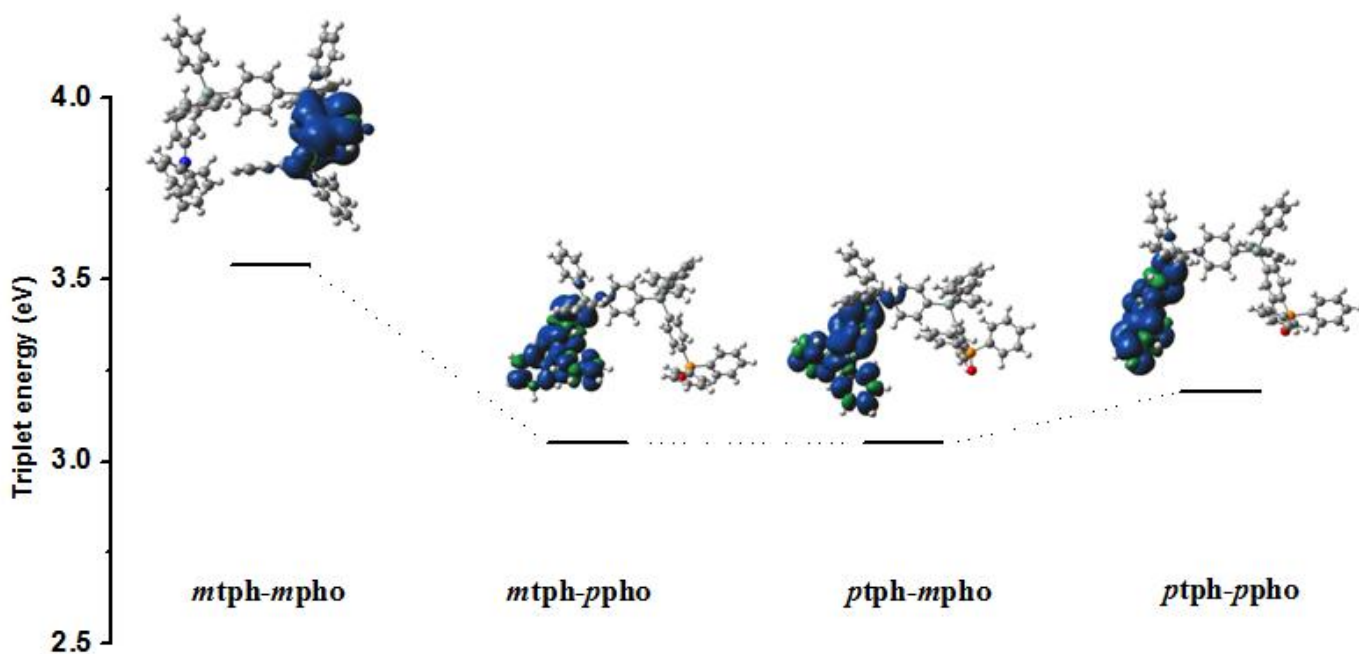

**SI 2.** Triplet spin density distribution of asymmetrically substituted tph-pho based host molecules at B3LYP/6-31G\* level of theory.

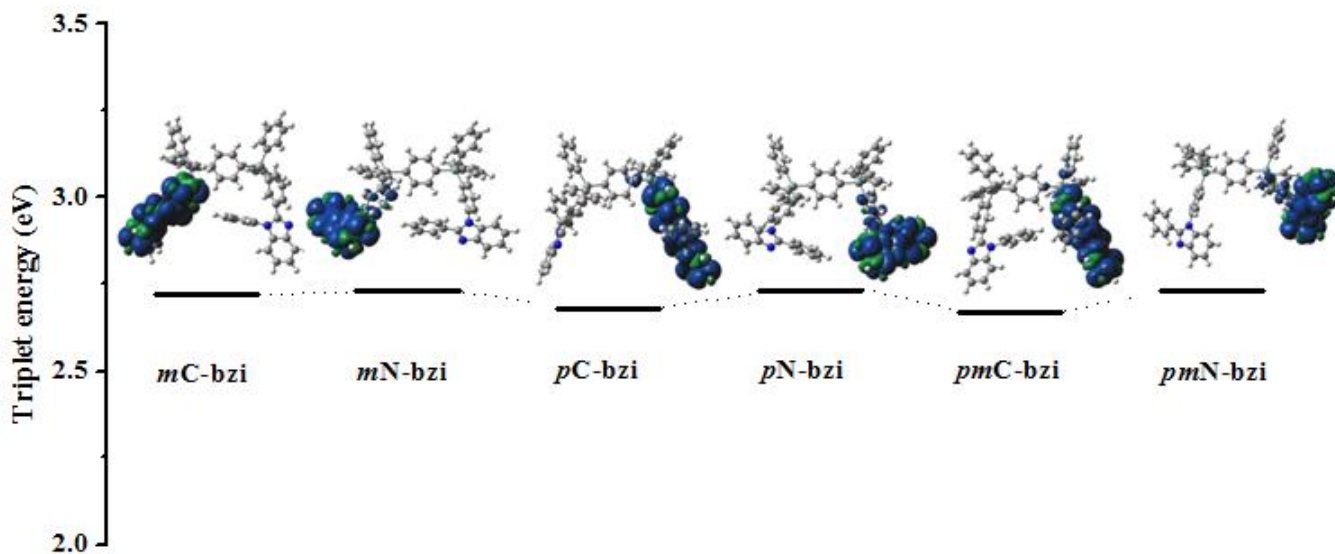

**SI 3.** Triplet spin density distribution of symmetrically substituted bzi based host molecules at B3LYP/6-31G\* level of theory.

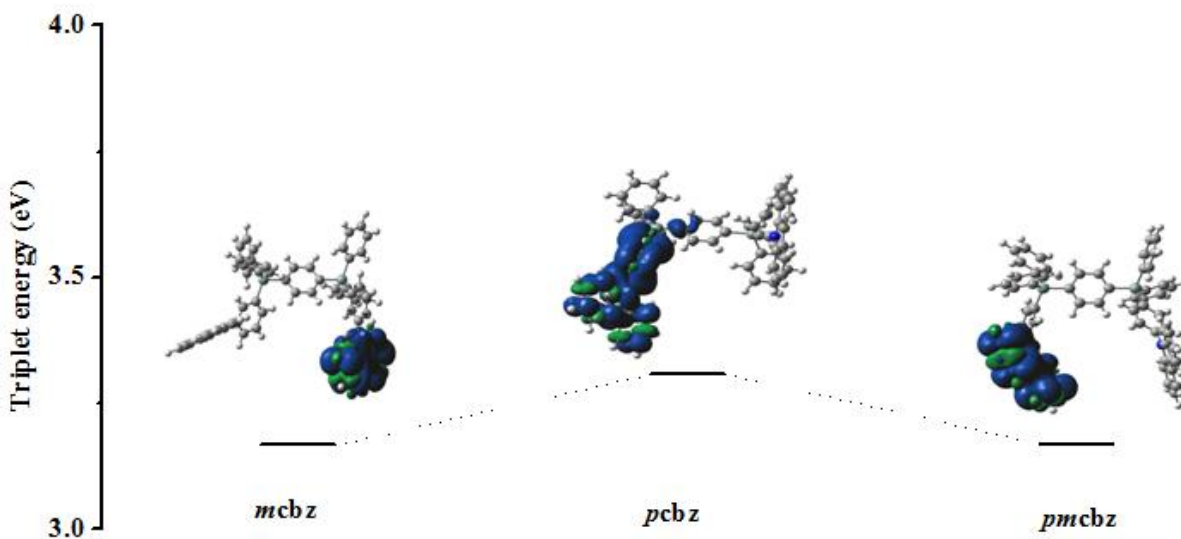

**SI 4.** Triplet spin density distribution of symmetrically substituted cbz based host molecules at B3LYP/6-31G\* level of theory.

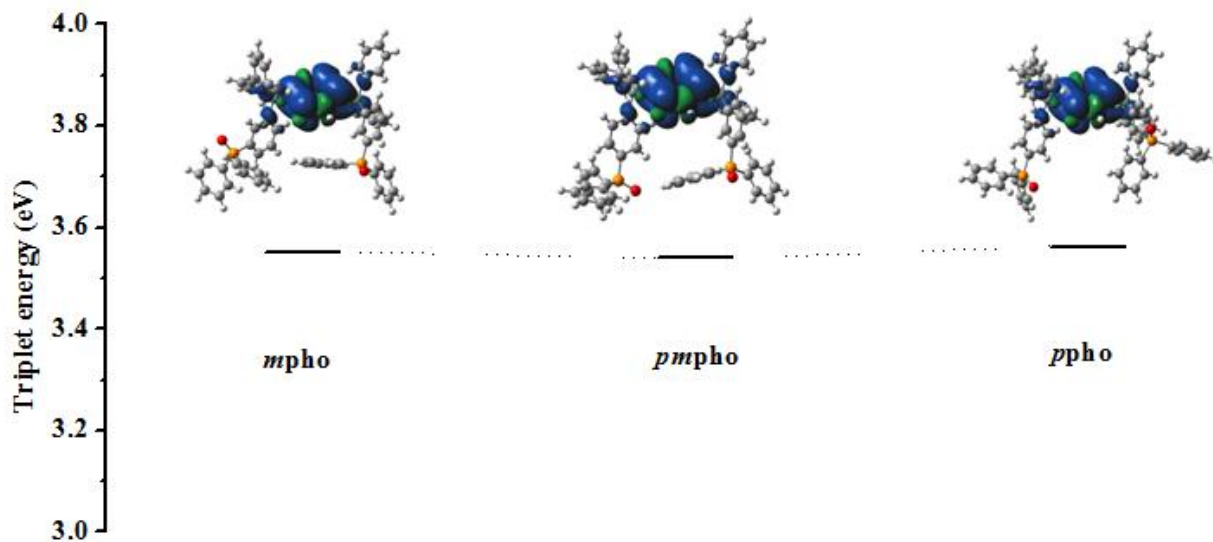

**SI 5.** Triplet spin density distribution of symmetrically substituted pho based host molecules at B3LYP/6-31G\* level of theory.

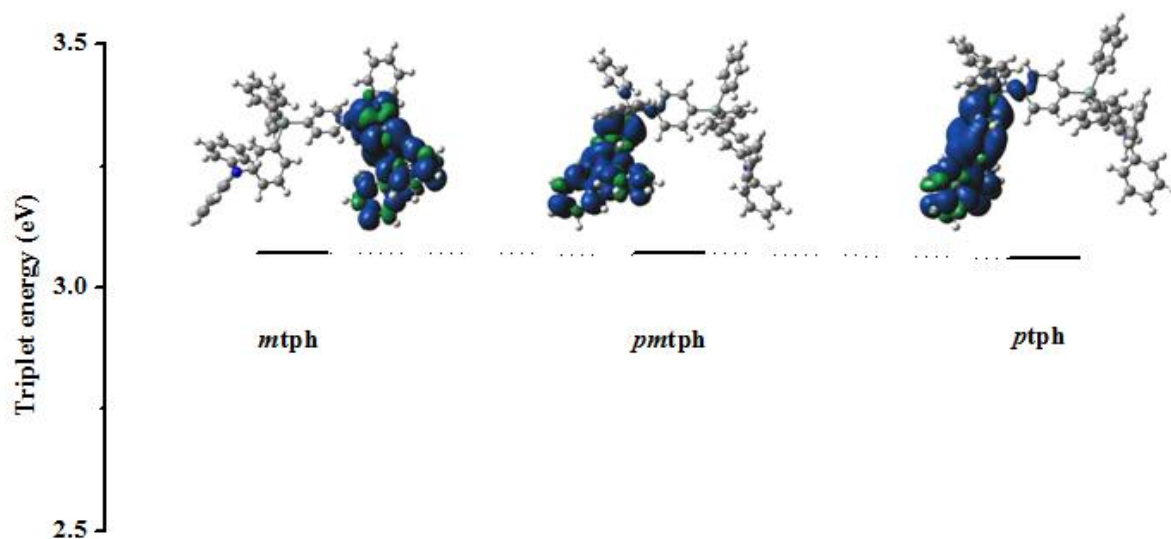

**SI 6.** Triplet spin density distribution of symmetrically substituted tph based host molecules at B3LYP/6-31G\* level of theory.

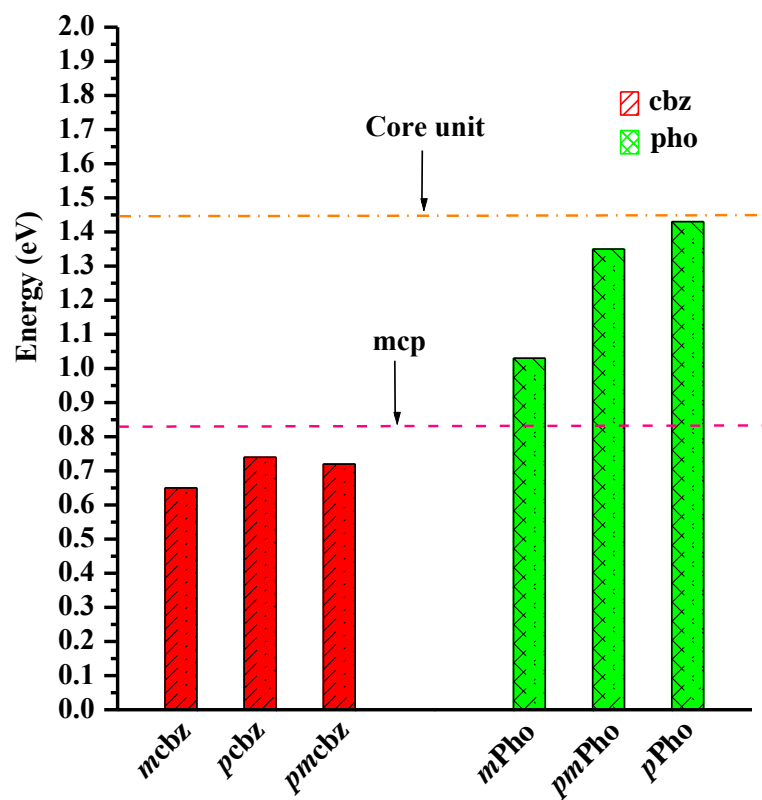

**SI 7.**  $\Delta E_{ST}$  for all the symmetrically substituted designed host molecules.  $\Delta E_{ST}$  of mcp and core unit is indicated by pink dashed line and orange dot line respectively.

**SI 8.** Total energies (in Hartree) of neutral, cation and anion hosts at their respective geometries.

| Asymmetric systems | Neutral      | Cation       | Anion        |
|--------------------|--------------|--------------|--------------|
| <b>cbz-bzi:</b>    |              |              |              |
| <i>mcbz-mN-bzi</i> | -3326.003025 | -3325.769035 | -3326.009716 |
| <i>mcbz-pN-bzi</i> | -3326.002468 | -3325.769388 | -3326.012182 |
| <i>pcbz-mN-bzi</i> | -3326.003475 | -3325.768519 | -3326.009426 |
| <i>pcbz-pN-bzi</i> | -3326.002846 | -3325.768943 | -3326.012303 |
| <b>cbz-pho:</b>    |              |              |              |
| <i>mcbz-mpho</i>   | -3595.576313 | -3595.333143 | -3595.581067 |
| <i>mcbz-ppho</i>   | -3595.576365 | -3595.33795  | -3595.582945 |
| <i>pcbz-mpho</i>   | -3595.577223 | -3595.332973 | -3595.58178  |
| <i>pcbz-ppho</i>   | -3595.576803 | -3595.333491 | -3595.583265 |
| <b>tph-bzi:</b>    |              |              |              |
| <i>mtph-mC-bzi</i> | -3327.176866 | -3326.95461  | -3327.182362 |
| <i>mtph-mN-bzi</i> | -3327.177788 | -3326.954924 | -3327.182558 |
| <i>ptph-mN-bzi</i> | -3327.17928  | -3326.955099 | -3327.183208 |
| <i>ptph-pN-bzi</i> | -3327.179764 | -3326.954534 | -3327.186954 |
| <b>tph-pho:</b>    |              |              |              |
| <i>mtph-mpho</i>   | -3596.752186 | -3596.535993 | -3596.754633 |
| <i>Ptph-ppho</i>   | -3596.752792 | -3596.525879 | -3596.758551 |
| Symmetric systems  |              |              |              |
| <b>cbz:</b>        |              |              |              |
| <i>mcbz</i>        | -3232.546334 | -3232.319287 | -3232.54794  |
| <i>pcbz</i>        | -3232.5473   | -3232.318857 | -3232.550055 |
| <i>pmcbz</i>       | -3232.546674 | -3232.318763 | -3232.548238 |
| <b>pho:</b>        |              |              |              |
| <i>mpho</i>        | -3958.606725 | -3958.332456 | -3958.611559 |
| <i>pmpho</i>       | -3958.610062 | -3958.33824  | -3958.61631  |
| <i>ppho</i>        | -3958.605508 | -3958.332658 | -3958.614472 |
| Core unit          | -2200.001659 | -2199.726521 | -2199.993425 |
| <i>mcp</i>         | -1264.792091 | -1264.551301 | -1264.780477 |
| <i>NPD</i>         | -1805.486405 | -1805.280691 | -1805.492849 |
| <i>TAZ</i>         | -1323.72191  | -1323.480044 | -1323.730992 |
| <i>Flrpic</i>      | -1895.47567  | -1895.234495 | -1895.5004   |
